# Supplementary material
Source: MDPI journal article supplement (https://www.mdpi.com/1996-1073/14/3/609)
Supplement: s1 [file s1]

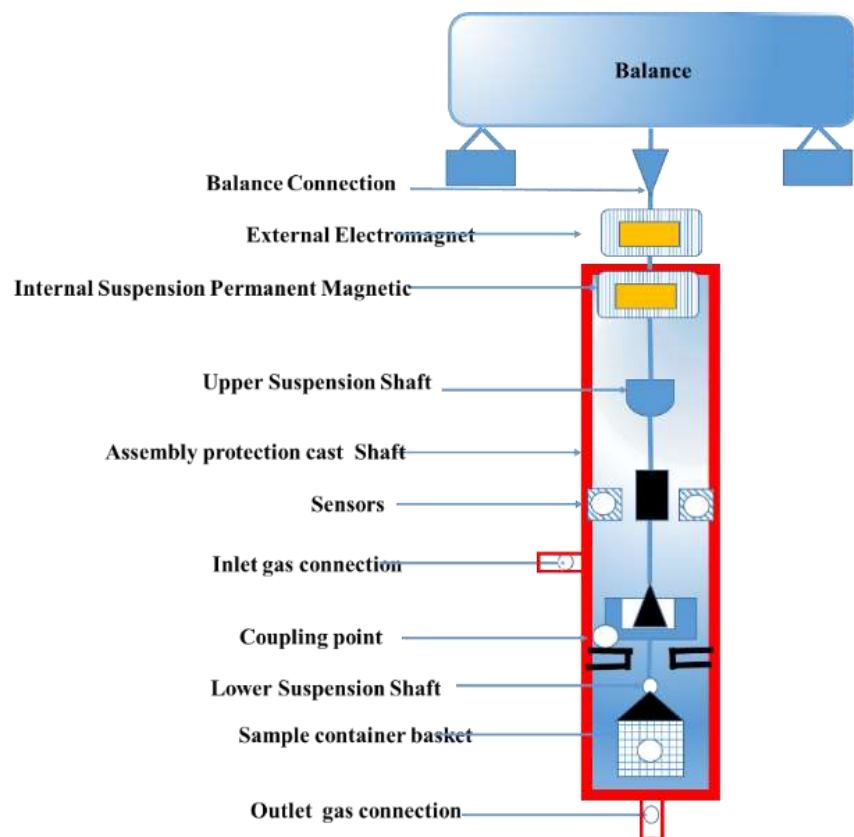

Figure S1: Schematic of High-pressure magnetic suspension (Rubotherm).

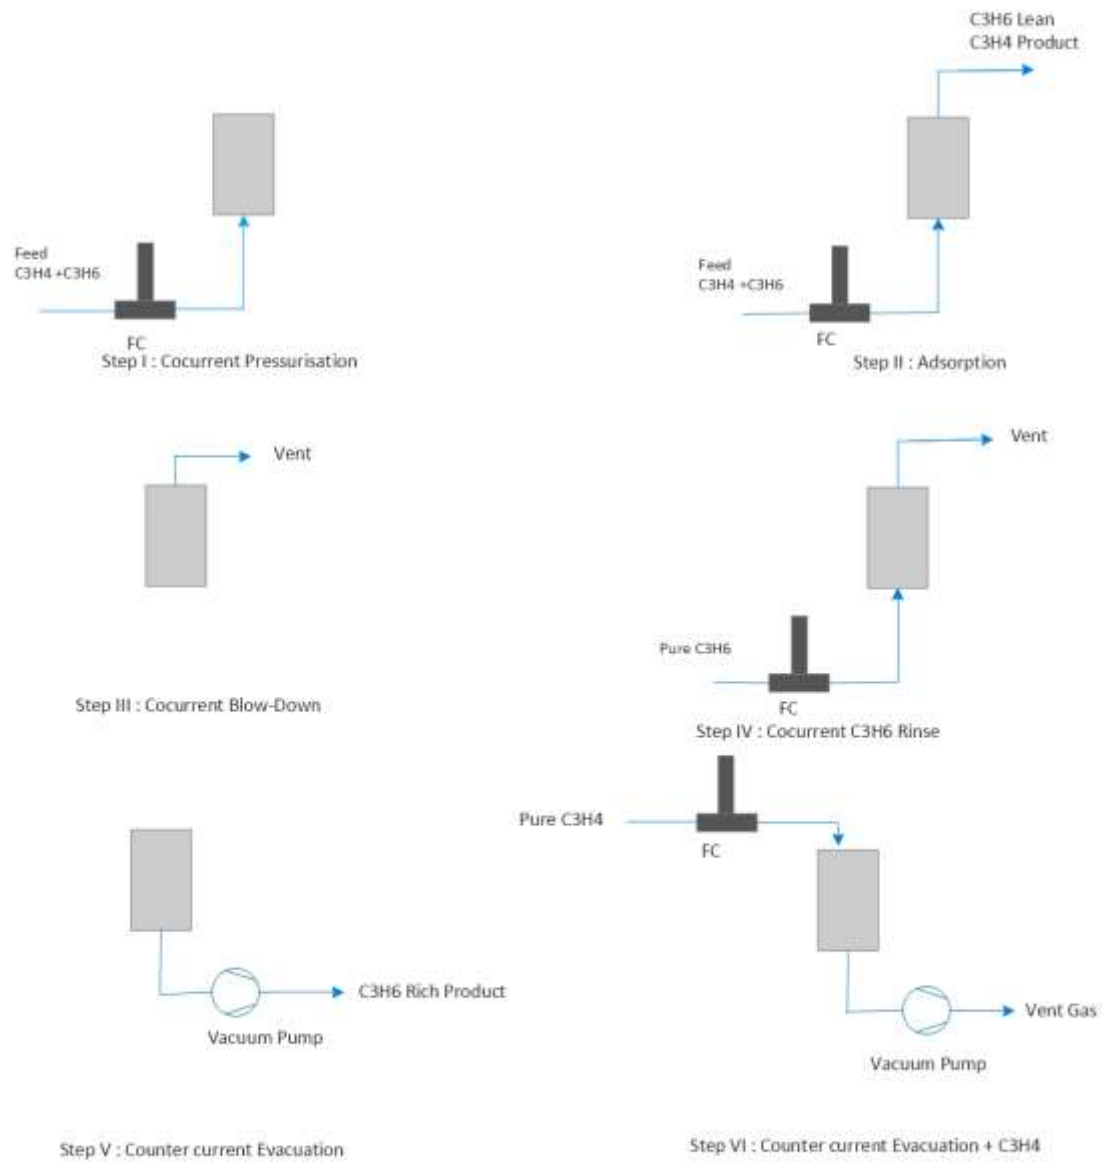

Figure S2: The 6 steps of the VSA cycle.

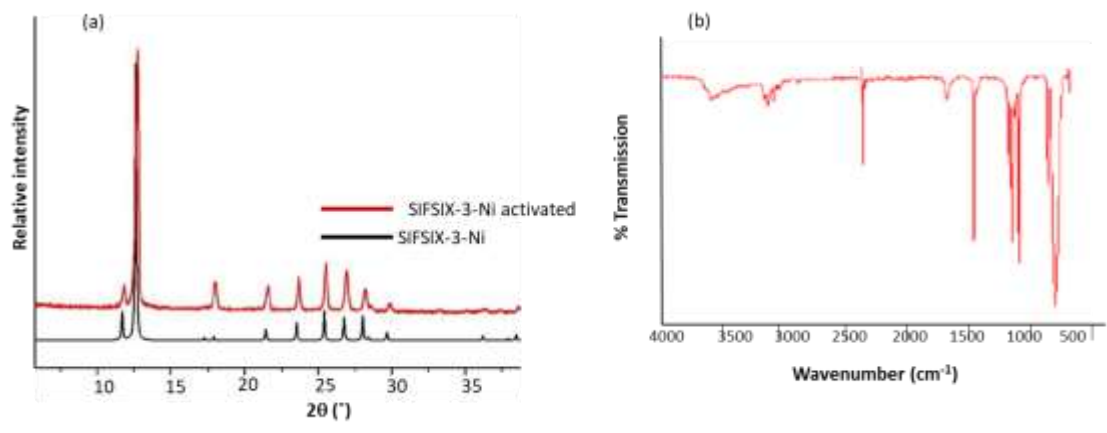

Figure S3: Characterization of the prepared SIFSIX-3-Ni (a) XRD and (b)FTIR.

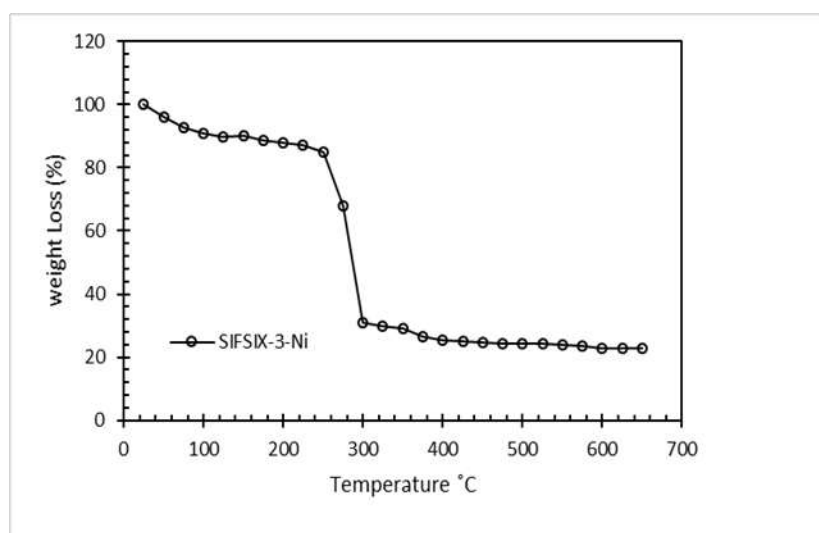

Figure S4: TGA mass loss with respect of temperature for the SIFSIX-3-Ni.

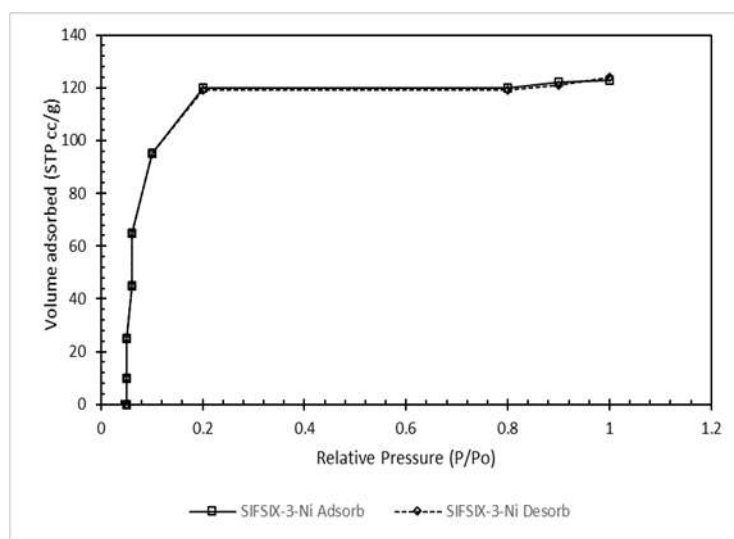

Figure S5:  $\text{N}_2$  adsorption desorption

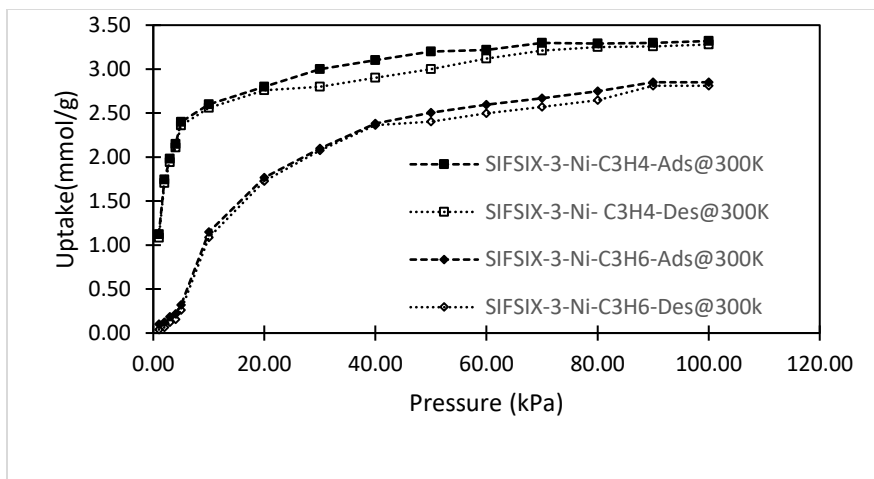

Figure S6: Adsorption and desorption of propylene and propyne at 300k.
